# Supplementary material
Source: PubMed Central journal article supplement (PMC3620314)
Supplement: NIHMS215914-supplement-Supplemental_Data.pdf [file NIHMS215914-supplement-Supplemental_Data.pdf]

**Supplementary table 1** Sirius red staining of human samples of viral hepatitis and hepatic cirrhosis.

|     | Viral Hepatitis (%) | Hepatic cirrhosis (%)* |
|-----|---------------------|------------------------|
| +++ | 0                   | 5 (39)                 |
| ++  | 2 (11)              | 2 (15)                 |
| +   | 7 (37)              | 5 (39)                 |
| —   | 10 (52)             | 1 (7)                  |
| N   | 19                  | 13                     |

\*Compared to viral hepatitis group,  $P=0.001$
